# Supplementary material for: Enhanced and unconventional responses in chemiresistive sensing devices for nitrogen dioxide and ammonia from carboxylated alkylthiophene polymers
Source: Royal Society of Chemistry journal article supplement (doi:10.1039/d0mh00049c), 2020-01-01
Supplement: d0mh00049c1.pdf [file d0mh00049c1.pdf]

Supporting Information

# Enhanced and Unconventional Responses in Chemiresistive Sensors for Ammonia and Nitrogen Dioxide from Carboxylated Alkylthiophene Polymers

Justine Wagner<sup>1</sup>, Hyun-June Jang<sup>1</sup>, Jinfeng Han<sup>1</sup>, Howard E. Katz<sup>1</sup>

<sup>1</sup>Department of Materials Science and Engineering, Johns Hopkins University, 3400 N. Charles St., Baltimore, USA

## Table of Contents

|                                                                           |              |
|---------------------------------------------------------------------------|--------------|
| <b>1 X-ray photoelectron spectroscopy.....</b>                            | <b>2-4</b>   |
| <b>2 Electronic properties and responses.....</b>                         | <b>5-10</b>  |
| <b>3 Remote gate data.....</b>                                            | <b>11-15</b> |
| <b>4 Polymerization.....</b>                                              | <b>16</b>    |
| <b>5 NMR Spectra.....</b>                                                 | <b>17-20</b> |
| <b>3.1 Poly(3-hexylthiophene-2,5-diyl)regioregular.....</b>               | <b>17</b>    |
| <b>3.2 Poly(3,3'' -didodecyl quarter thiophene).....</b>                  | <b>18</b>    |
| <b>3.3 Poly[3-(3-Carboxypropyl)thiophene-2,5-diyl]regioregular.....</b>   | <b>19</b>    |
| <b>3.4 Poly[3-(Ethyl-4-butanoate)thiophene-2,5-diyl]regioregular.....</b> | <b>20</b>    |
| <b>6 Gel Permeation Chromatography (GPC).....</b>                         | <b>21</b>    |

## X-Ray Photoelectron Spectroscopy (XPS)

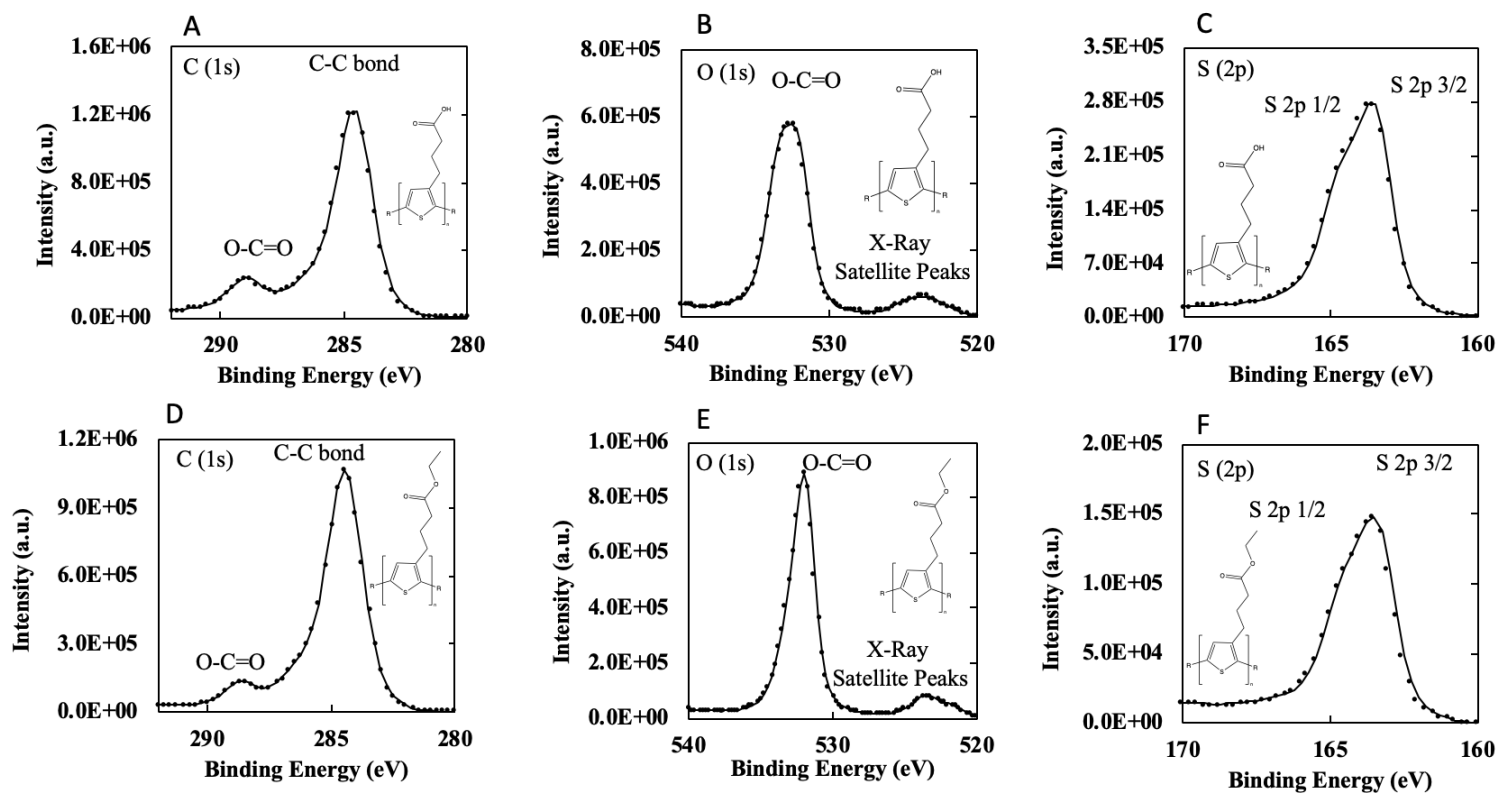

Figure S1. Core level spectra of C 1s, S 2p, and O 1s for A,B,C) PT-COOH and D, E,F) PT-COOR thin film on Si/SiO<sub>2</sub> (300 nm).

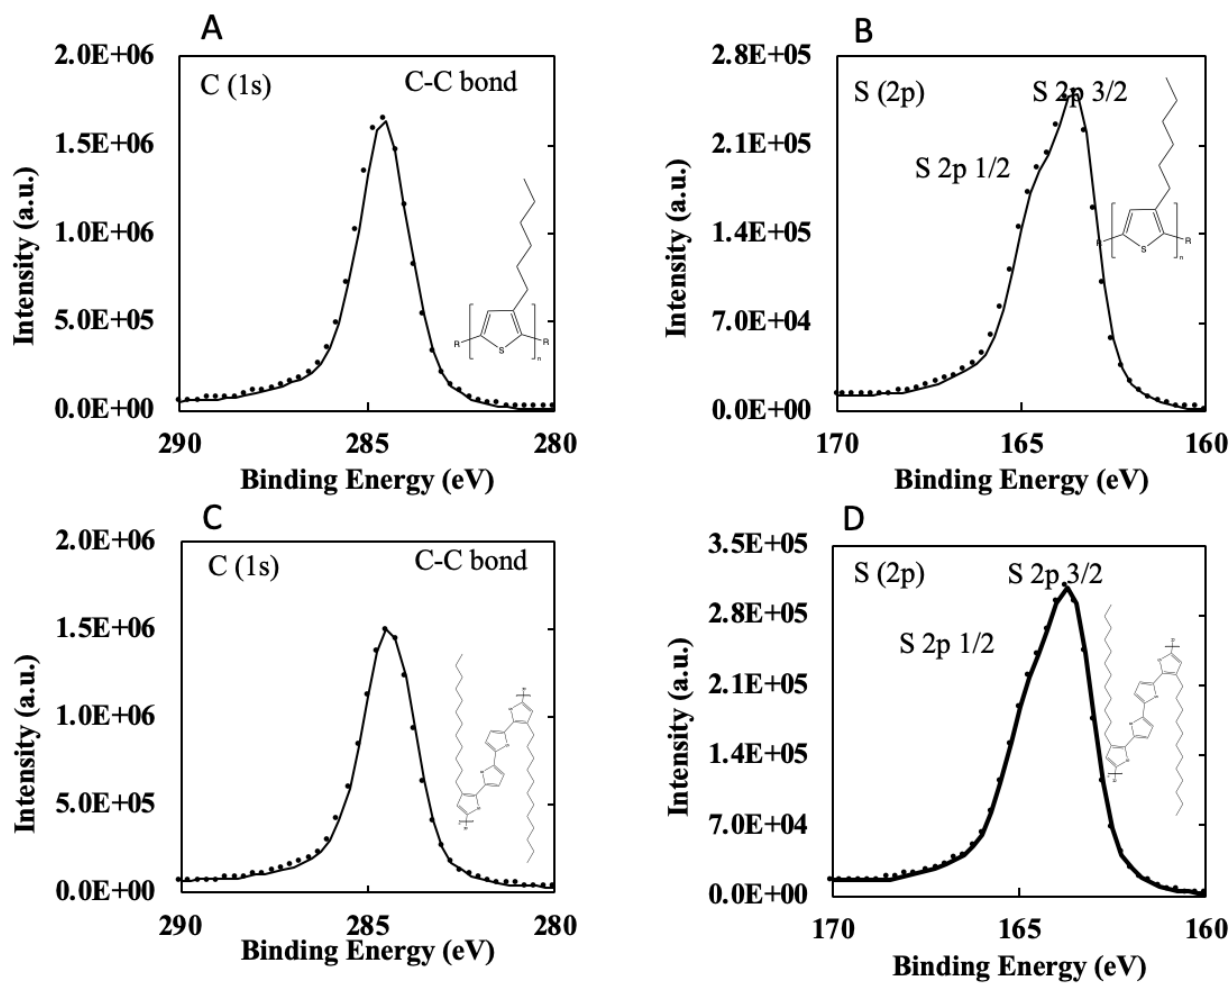

Figure S2. Core level spectra of C 1s and S 2p, for A,B) P3HT and C,D) PQT12 thin film on Si/SiO<sub>2</sub> (300 nm).

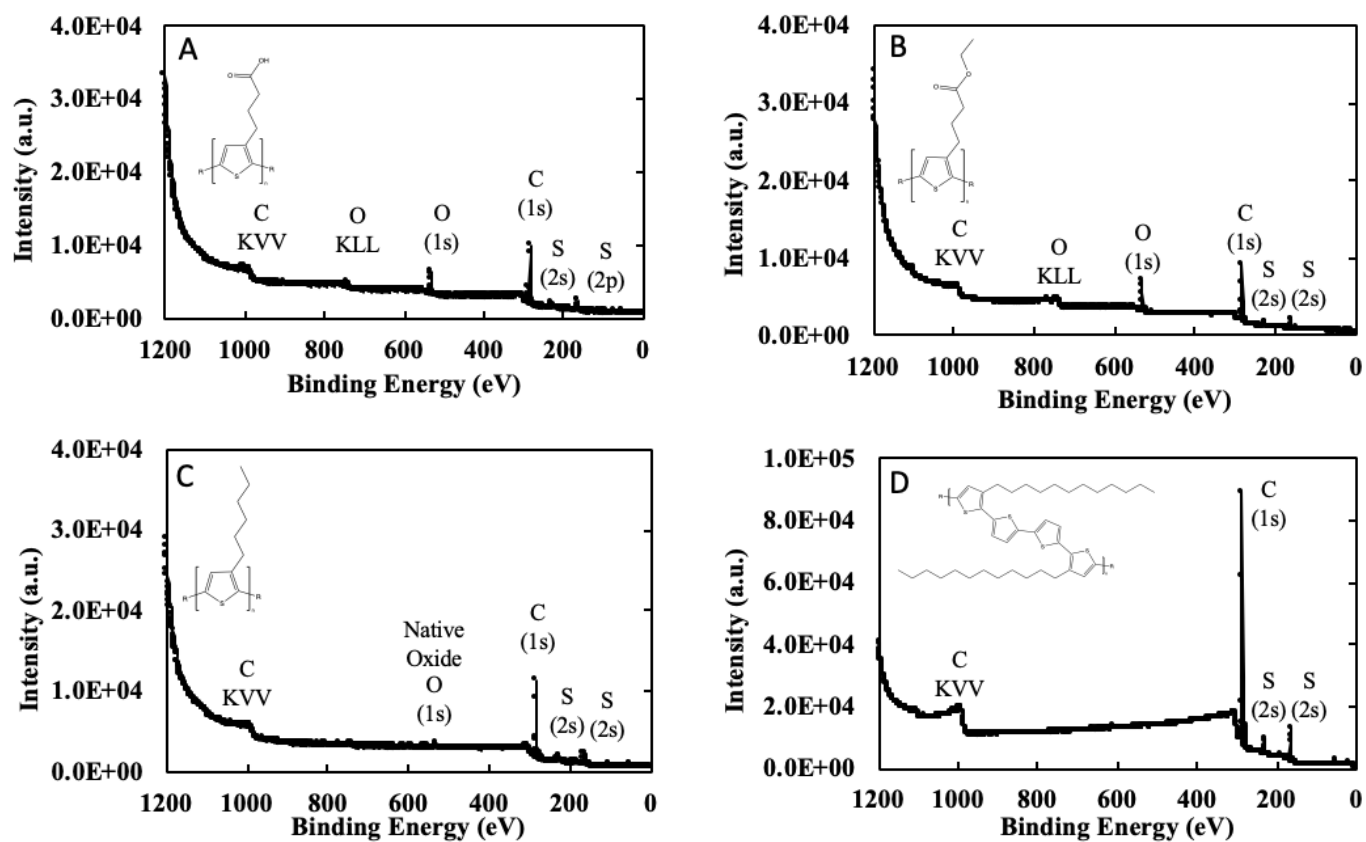

Figure S3. Full surface scan of A) PT-COOH, B) PT-COOR, C) P3HT, D) PQT12 thin film on Si/SiO<sub>2</sub> (300 nm) surface compositional analysis using XPS.

| Polymer Sensing Layer | Film Thickness (nm) | $V_T$ (V) | $I_{on}/I_{off}$ | $\mu$ ( $\text{cm}^2/\text{V}\cdot\text{s}$ ) |
|-----------------------|---------------------|-----------|------------------|-----------------------------------------------|
| P3HT                  | $20 \pm 5$          | 8-13      | 310              | $1.8 \times 10^{-4} \pm 7\text{E-}5$          |
| PQT12                 | $20 \pm 5$          | -18.5     | 340              | $5.4 \times 10^{-4} \pm 2\text{E-}4$          |
| PT-COOR               | $20 \pm 5$          | 3-14      | 1.1              | $1.2 \times 10^{-2} \pm 6\text{E-}3$          |
| PT-COOH               | $20 \pm 5$          | 14-18     | 1.1              | $2.3 \times 10^{-2} \pm 8\text{E-}3$          |

Table S1. Transistor characteristic parameters of OFET configured flexible devices for PT-COOH, PT-COOR, P3HT, and PQT12.

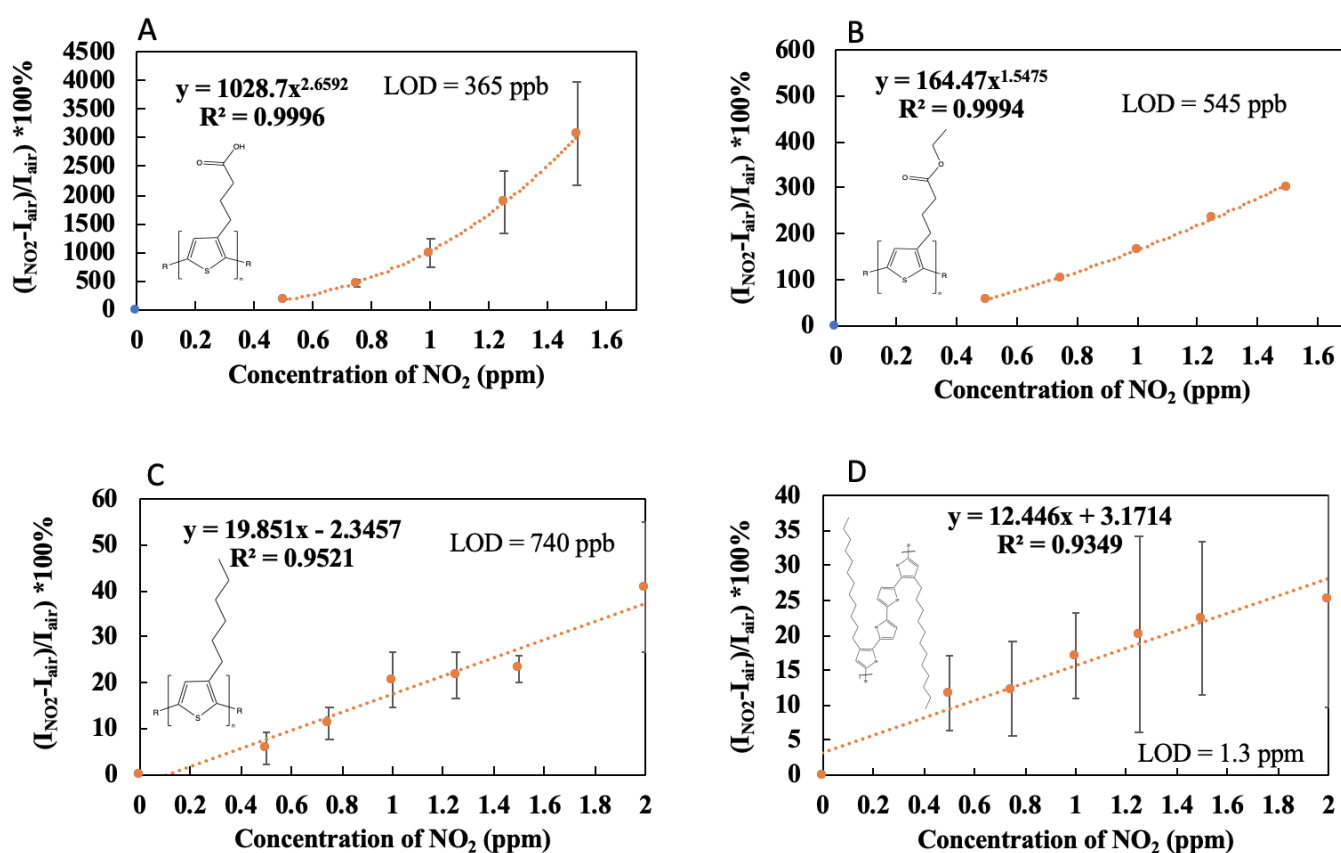

Figure S4. Theoretical Extraction of LOD for each polymer sensing layer A) PT-COOH, B) PT-COOR, C) P3HT, D) PQT12 with exposure to various concentrations of  $\text{NO}_2$  for 3 minutes before each consecutive measurement under continuous flow analysis. Slope represents sensitivity response % per ppm.

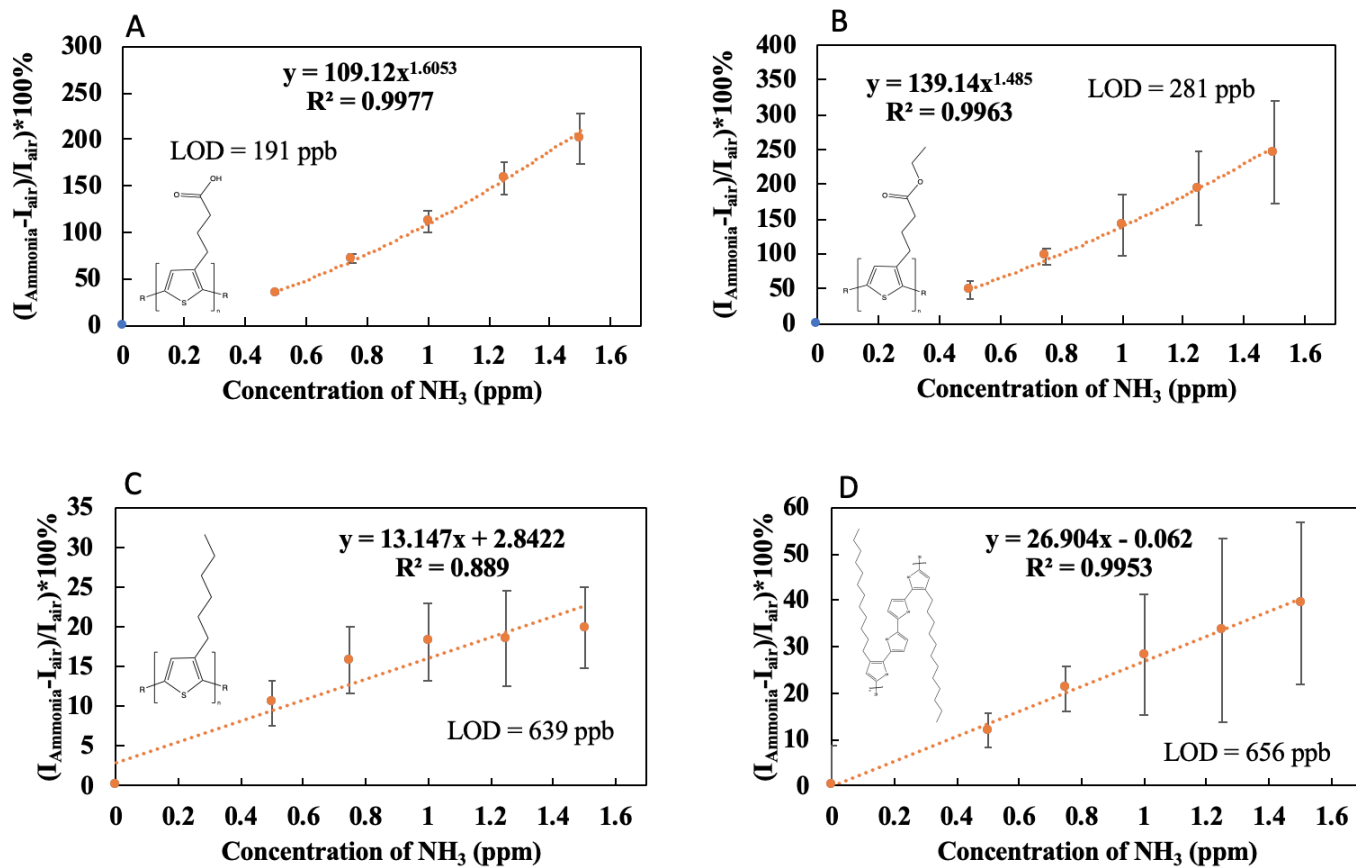

Figure S5. Theoretical Extraction of LOD for each polymer sensing layer A) PT-COOH, B) PT-COOR, C) P3HT, D) PQT12 with exposure to various concentrations of NH<sub>3</sub> for 3 minutes before each consecutive measurement under continuous flow analysis. Slope represents sensitivity response % per ppm.

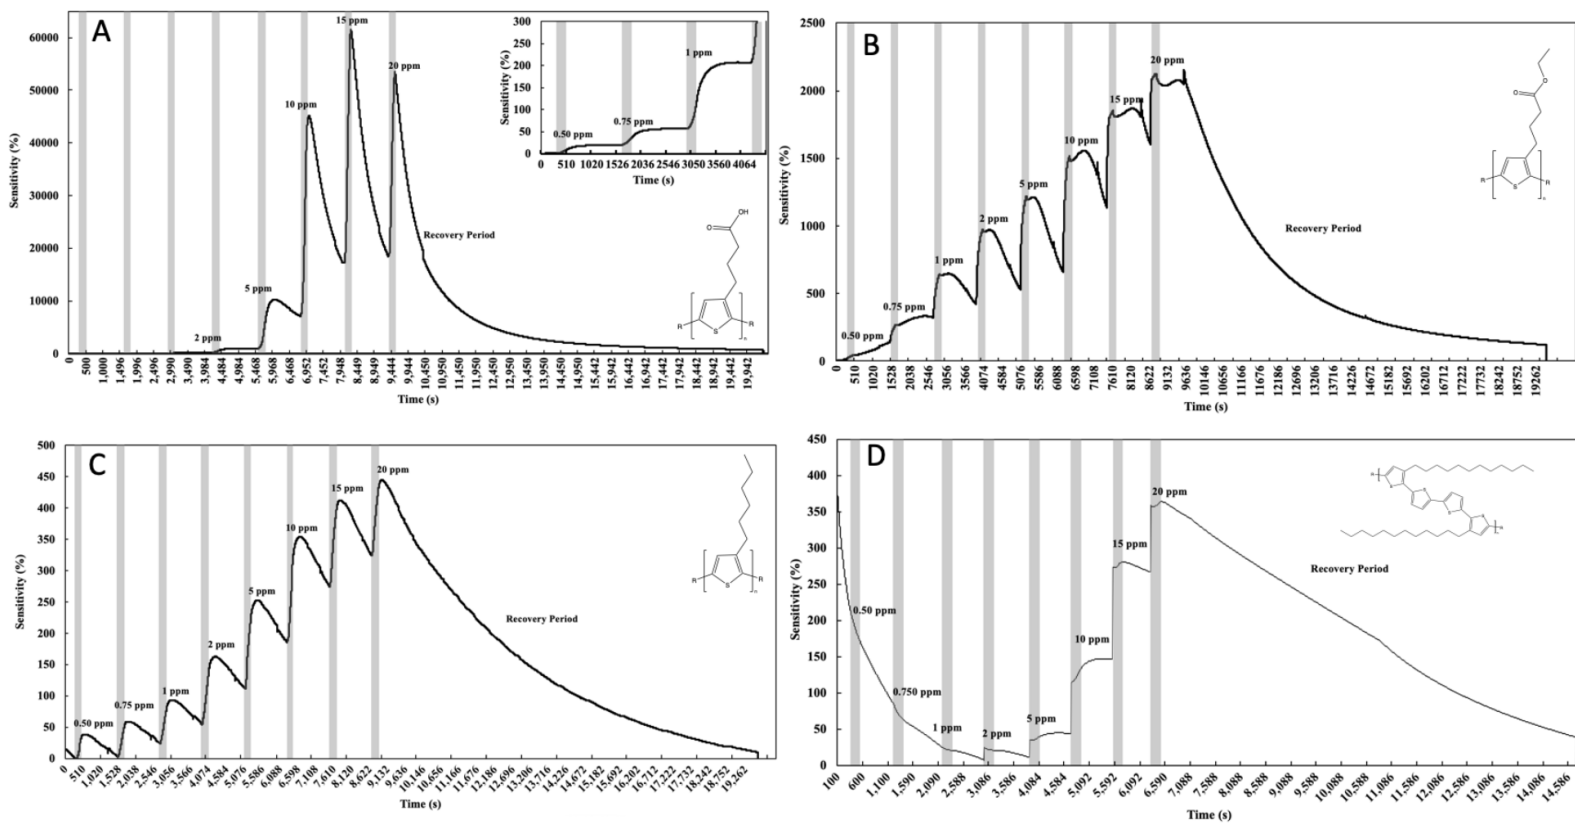

Figure S6. Real time sensitivity and recovery response of A) PT-COOH, B) PT-COOR, C) P3HT, D) PQT12 with devices exposed to continuous flow exposure of NO<sub>2</sub>. Gray area indicates the time span of gas at specific concentration being turned on and then off. The total duration of time is 180 seconds followed by 12 minutes of recovery before re-exposure to subsequent higher gas concentration.

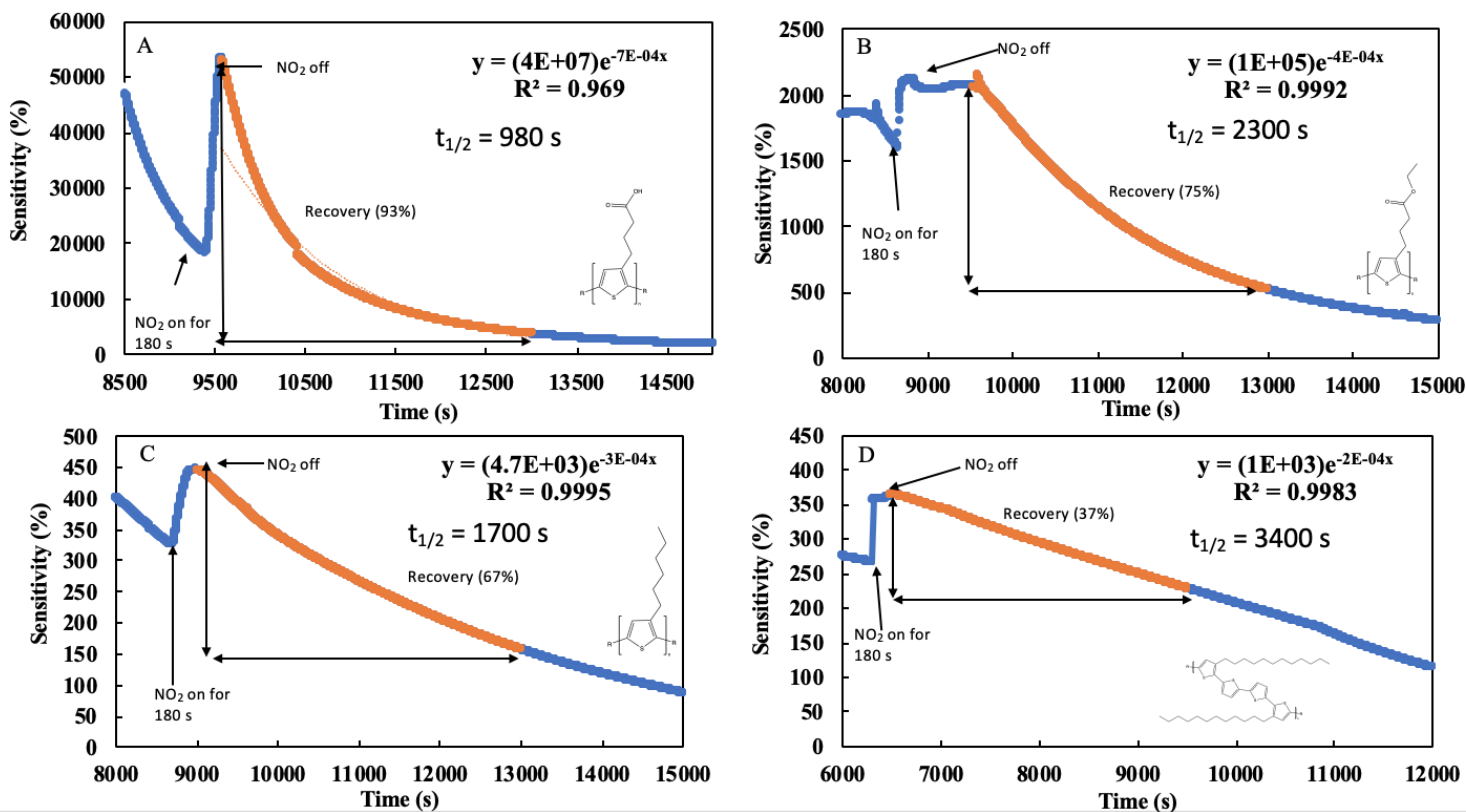

Figure S7. Analysis of recovery response of A) PT-COOH, B) PT-COOR, C) P3HT, D) PQT12 devices after exposure to 20 ppm of NO<sub>2</sub>. Best exponential decay fit line was obtained with linear regression being > 90%. Recovery involved allowing device to be exposed to continuous purified air. Half-life formula was obtained where  $t = -\ln(2)/k$ . This is taking into account that our exponential decay fit follows a  $y = A \cdot e^{kt}$  model.



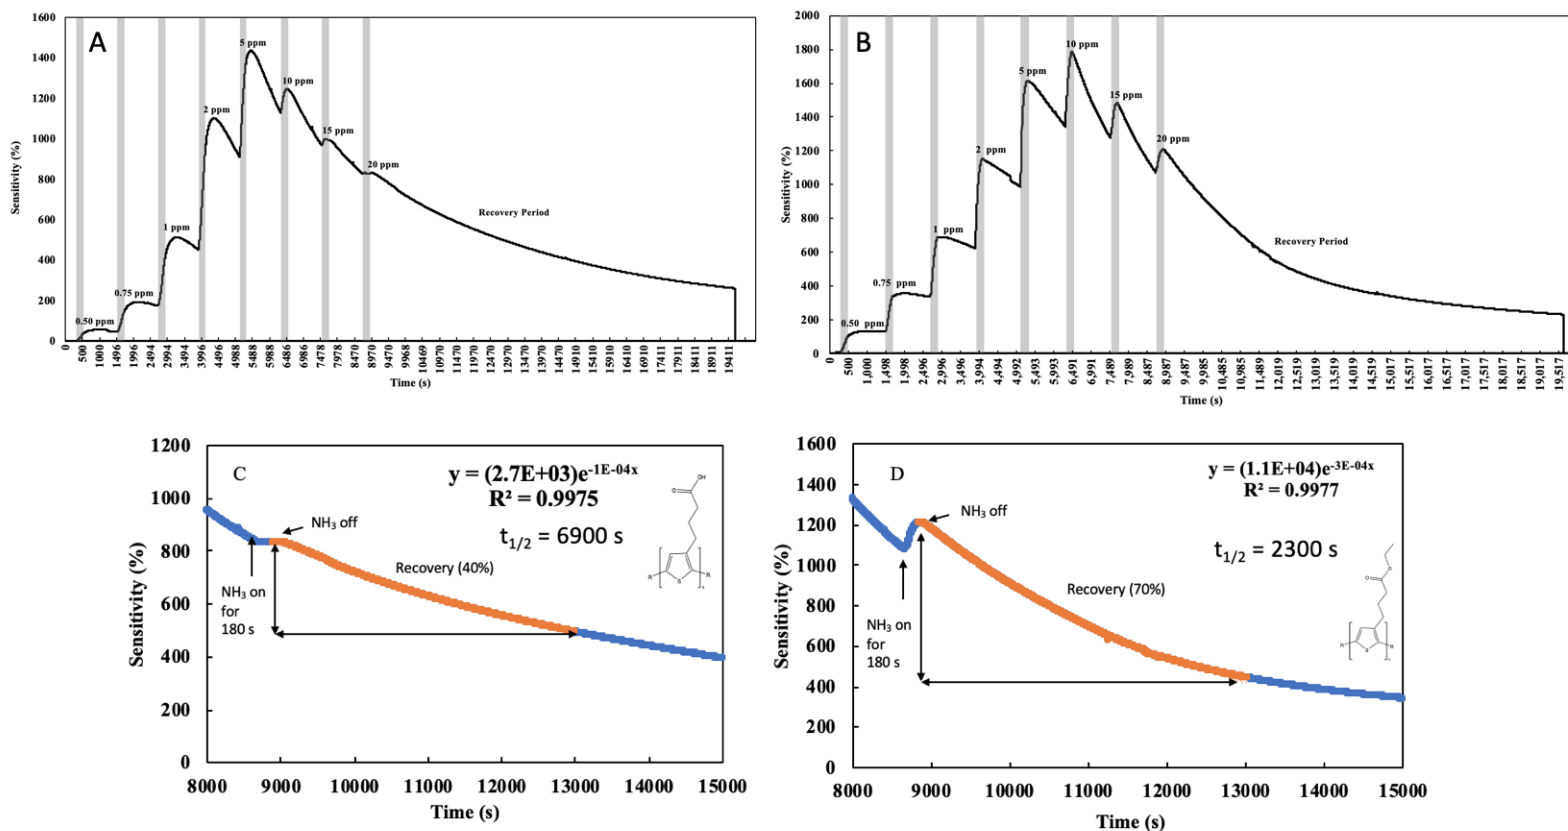

Figure S8. Real time sensitivity and recovery analysis of A) PT-COOH and B) PT-COOR with devices exposed to continuous gas flow of NH<sub>3</sub>. Gray area indicates the time span of gas at specific concentration being turned on and then off. The total duration of time is 180 seconds followed by 12 minutes of recovery before re-exposure to subsequent higher gas concentration. Best exponential decay fit line was obtained with linear regression being > 90%. Recovery involved allowing device to be exposed to continuous purified air. Half-life formula was obtained where  $t = -\ln(2)/k$ . This is taking into account that our exponential decay fit follows a  $y = A \cdot e^{kt}$  model.

| Line of Best Fit              | Polymer Sensing Layer<br>LOD Determination NO <sub>2</sub> Exposure |               |               |               |
|-------------------------------|---------------------------------------------------------------------|---------------|---------------|---------------|
|                               | PT-COOH                                                             | PT-COOR       | P3HT          | PQT12         |
| Linear                        | 200 ppb                                                             | 557 ppb       | 740 ppb       | 1.3 ppm       |
| Power                         | 365 ppb                                                             | 545 ppb       | 556 ppb       | 863 ppb       |
| Linearizing<br>Power Function | 226 ppb                                                             | 679 ppb       | 750 ppb       | 1.04 ppm      |
| Average LOD                   | 260 ± 90 ppb                                                        | 590 ± 70 ppb  | 680 ± 110 ppb | 1.1 ± 0.2 ppm |
| Line of Best Fit              | Polymer Sensing Layer<br>LOD Determination NH <sub>3</sub> Exposure |               |               |               |
|                               | PT-COOH                                                             | PT-COOR       | P3HT          | PQT12         |
| Linear                        | 99.4 ppb                                                            | 242 ppb       | 639 ppb       | 656 ppb       |
| Power                         | 191 ppb                                                             | 281 ppb       | 656 ppb       | 602 ppb       |
| Linearizing<br>Power Function | 254 ppb                                                             | 471 ppb       | 1.4 ppm       | 1.3 ppm       |
| Average LOD                   | 180 ± 80 ppb                                                        | 330 ± 120 ppb | 900 ± 400 ppb | 850 ± 400 ppb |

#### LOD Extraction from Linear Plot

$$\text{LOD} = \frac{3 \cdot (\text{Standard Deviation of lowest concentration})}{\text{Slope}} * 1000 \frac{\text{ppb}}{\text{ppm}}$$

#### LOD Extraction from Power Plot

$$\text{LOB} = \text{Mean}_{\text{Blank}} + 1.645 \cdot (\text{Standard Deviation of the Blank})$$

$$\text{Limit of \%Sensitivity} = \text{LOB} + 1.645 \cdot (\text{Standard Deviation of lowest concentration})$$

LOD = Insert limit of % Sensitivity into best fit power function to obtain LOD concentration

Table S2. Limit of detection determination for PT-COOH, PT-COOR, P3HT, and PQT12 under the exposure of NO<sub>2</sub> and NH<sub>3</sub>. For the generated calibration curve either fit a linear function or power function in order to extract LOD. In addition, converted a non-linear power function to a linear function to obtain LOD. If best fit line was linear response used the formula presented above utilizing the slope. However, for the power function, incorporated the limit of the blank and obtained limit of % Sensitivity in order to plug into original power equation to obtain LOD.

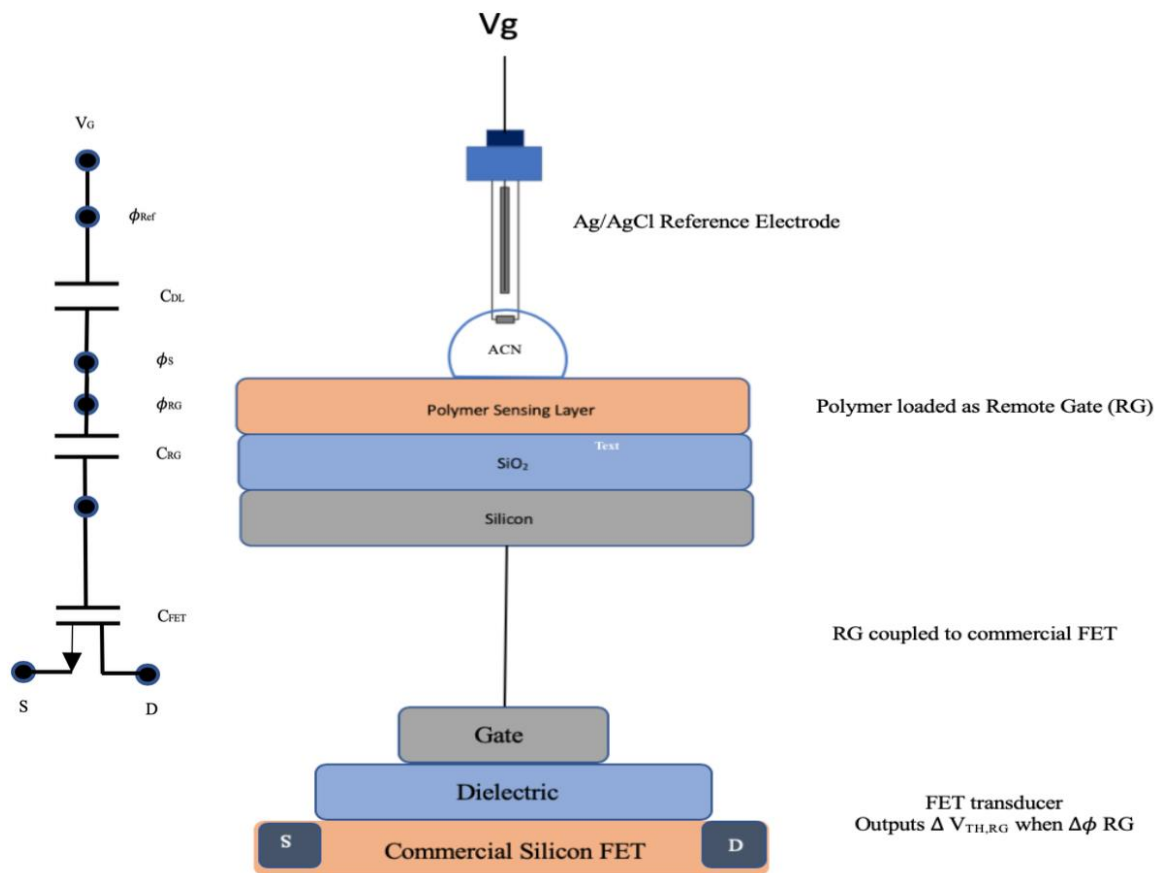

Scheme S2. RG FET system and equivalent circuit model for gas sensing quantification detection system.

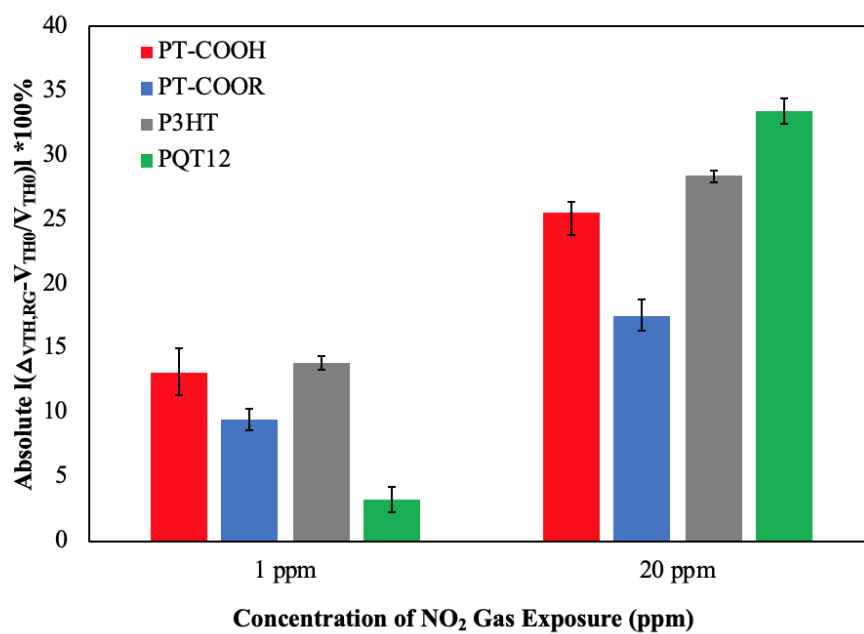

Figure S9.  $V_{TH, RG}$  sensitivity of polymer sensing layer with exposure to NO<sub>2</sub> (1 ppm and 20 ppm) using RG platform voltage shift analysis.

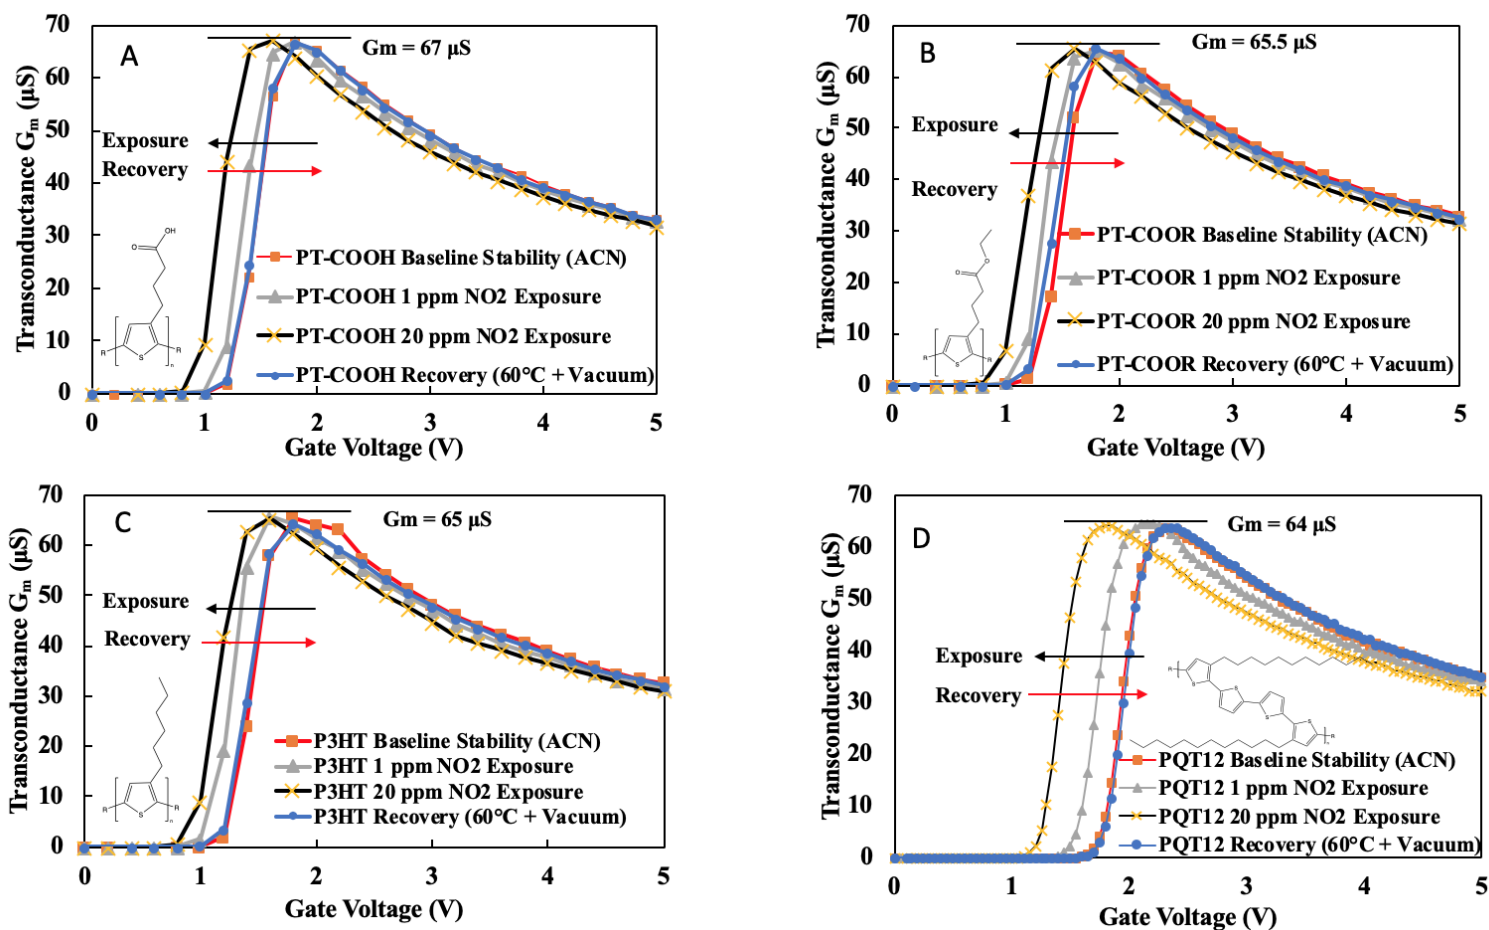

Figure S10.  $G_m$  distribution of polymer sensing layer A) PT-COOH, B) PT-COOR, C) P3HT, D) PQT12 with ACN as stability point and exposure with  $\text{NO}_2$  (1 ppm and 20 ppm); as well as recovery analysis using RG platform voltage shift analysis.

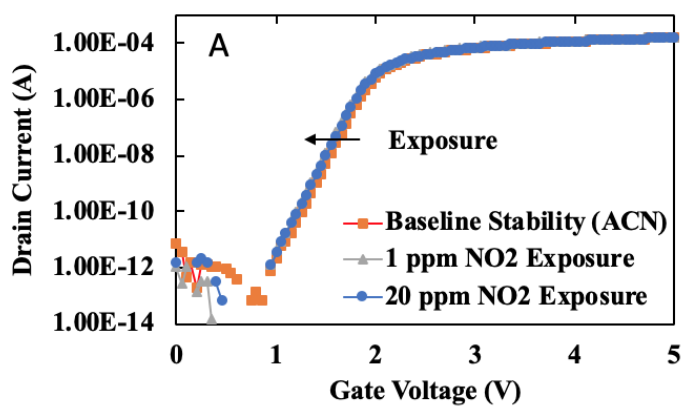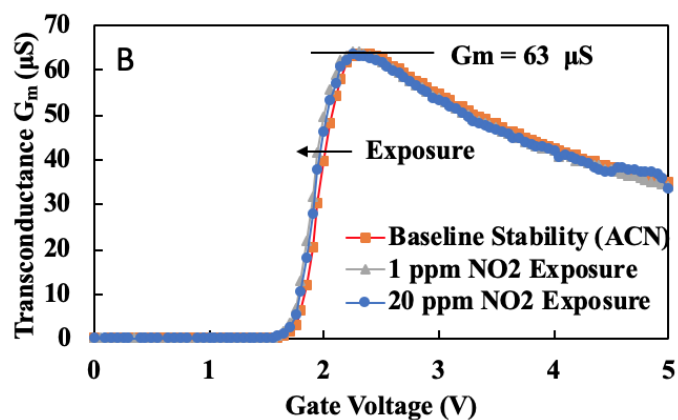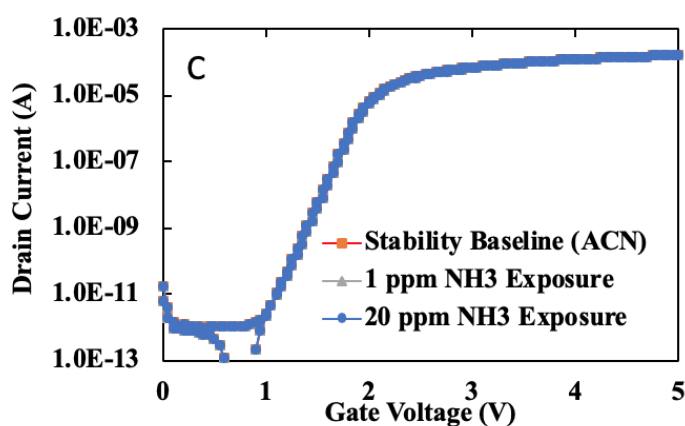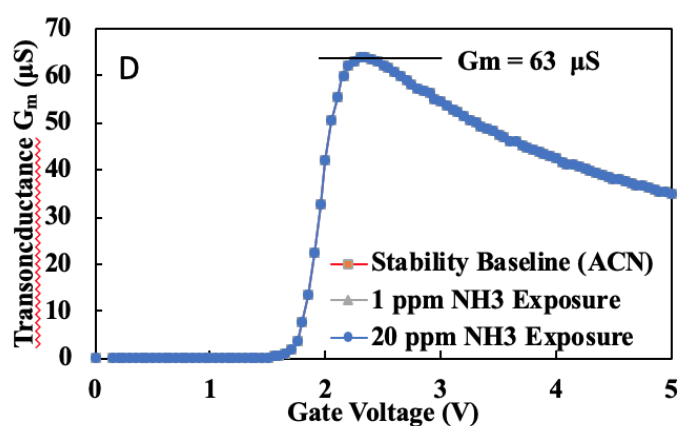

Figure S11. A,B)  $V_{TH, RG}$  and C,D)  $G_m$  of control surface analysis of Si/SiO<sub>2</sub> (300 nm) surface with ACN as stability point and exposure to NO<sub>2</sub> (1 ppm and 20 ppm) and NH<sub>3</sub> (1 ppm and 20 ppm) using RG platform voltage shift analysis.

| Samples | Gas             | Concentration | $\sigma$ ( S/cm) | $\Delta V_{th, RG}$ (V) | $p$ (cm <sup>-3</sup> ): RG                      | $\mu$ (cm <sup>2</sup> /Vs) : RG                 |
|---------|-----------------|---------------|------------------|-------------------------|--------------------------------------------------|--------------------------------------------------|
| PT-COOH | -               | No Exposure   | 7.20E-02 ± 0.01  | -                       | 1.34 x 10 <sup>19</sup> ± 3.1 x 10 <sup>18</sup> | 1.98 x 10 <sup>-2</sup> ± 7.0 x 10 <sup>-3</sup> |
|         | NO <sub>2</sub> | 1 ppm         | 7.56E-01 ± 0.04  | -0.15 ± 0.02            | 6.5 x 10 <sup>21</sup> ± 2.6 x 10 <sup>21</sup>  | 2.75 x 10 <sup>-1</sup> ± 9.8 x 10 <sup>-2</sup> |
|         | NH <sub>3</sub> | 1 ppm         | 4.12E-01 ± 0.1   | -                       | -                                                | -                                                |
| PT-COOR | -               | No Exposure   | 1.85E-02 ± 3E-03 | -                       | 7.1 x 10 <sup>18</sup> ± 8.5 x 10 <sup>17</sup>  | 1.7 x 10 <sup>-2</sup> ± 1.8 x 10 <sup>-3</sup>  |
|         | NO <sub>2</sub> | 1 ppm         | 5.97E-02 ± 0.01  | -0.11 ± 0.01            | 5.1 x 10 <sup>20</sup> ± 6.1 x 10 <sup>19</sup>  | 5.3 x 10 <sup>-2</sup> ± 5.9 x 10 <sup>-3</sup>  |
|         | NH <sub>3</sub> | 1 ppm         | 4.37E-02 ± 0.01  | -                       | -                                                | -                                                |
| P3HT    | -               | No Exposure   | 1.05E-03 ± 3E-05 | -                       | 4.3 x 10 <sup>19</sup> ± 7.8 x 10 <sup>18</sup>  | 1.6 x 10 <sup>-4</sup> ± 3.1 x 10 <sup>-5</sup>  |
|         | NO <sub>2</sub> | 1 ppm         | 2.08E-03 ± 1E-03 | -0.07 ± 0.01            | 4.9 x 10 <sup>20</sup> ± 1.5 x 10 <sup>20</sup>  | 3.1 x 10 <sup>-4</sup> ± 6.2 x 10 <sup>-5</sup>  |
|         | NH <sub>3</sub> | 1 ppm         | 1.00E-03 ± 1E-04 | -                       | -                                                | -                                                |
| PQT12   | -               | No Exposure   | 1.00E-3 ± 4E-04  | -                       | 1.3 x 10 <sup>19</sup> ± 4.9 x 10 <sup>18</sup>  | 5.4 x 10 <sup>-4</sup> ± 2.3 x 10 <sup>-4</sup>  |
|         | NO <sub>2</sub> | 1 ppm         | 1.04E-03 ± 5E-04 | -0.05 ± 0.02            | 9.2 x 10 <sup>19</sup> ± 3.5 x 10 <sup>19</sup>  | 5.6 x 10 <sup>-4</sup> ± 2.4 x 10 <sup>-4</sup>  |
|         | NH <sub>3</sub> | 1 ppm         | 8.00E-04 ± 2E-05 | -                       | -                                                | -                                                |

**Table S3.** Electrical parameters consisting of conductivity,  $\Delta V_{TH, RG}$ , hole concentrations of polymer sensing layer before and after 1 ppm exposure of NO<sub>2</sub> due to calculating the voltage shift occurrence with the incorporation of the RG FET platform.  $\Delta V_{TH, RG}$  was calculated by taking the average value of  $V_{TH, RG}$  from four trials. Mobility for unexposed devices was obtained from FET measurements, while mobility for NO<sub>2</sub>-exposed devices was calculated based on hole concentrations obtained by using  $\sigma = e \cdot \mu_h \cdot p_0$ . Initial hole concentration was obtained from  $\mu_h$  from OFET using transfer curve and conductivity ( $\sigma$ ).

### Polymerization:

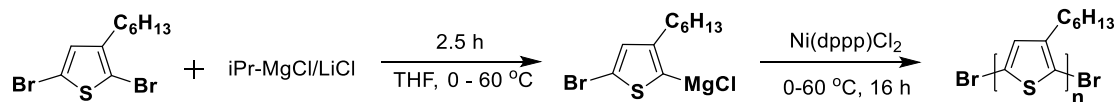

2,5-dibromo-3-hexylthiophene (500 mg, 1.53 mmol) was added to 8 mL anhydrous THF under  $\text{N}_2$ , then purge and fill with  $\text{N}_2$  for three times. 0.92 mL isopropylmagnesium chloride (2 M in THF) was added to the solution of LiCl (64.9 mg, 1.53 mmol), then the complex solution was added dropwise to the solution of 2,5-dibromo-3-hexylthiophene at  $0\text{ }^\circ\text{C}$ , 0.5 h later, the solution was heated to  $60\text{ }^\circ\text{C}$  and stirred for 2 h. After solution cooled to  $0\text{ }^\circ\text{C}$ , catalyst  $\text{Ni(dppp)Cl}_2$  (24.3 mg, 3% eq.) was added under  $\text{N}_2$ . 10 min later, the solution was heated to  $60\text{ }^\circ\text{C}$  and stirred about 16 h. The reaction mixture was precipitated into a well-stirred solution of methanol (100 mL) and stirred for 10 min. The resulting suspension was filtered with filter paper and extracted (Soxhlet) with acetone for 3 days and dried under vacuum to afford a dark solid.



## NMR Spectra:

### Poly(3-hexylthiophene-2,5-diyl)regioregular (P3HT)

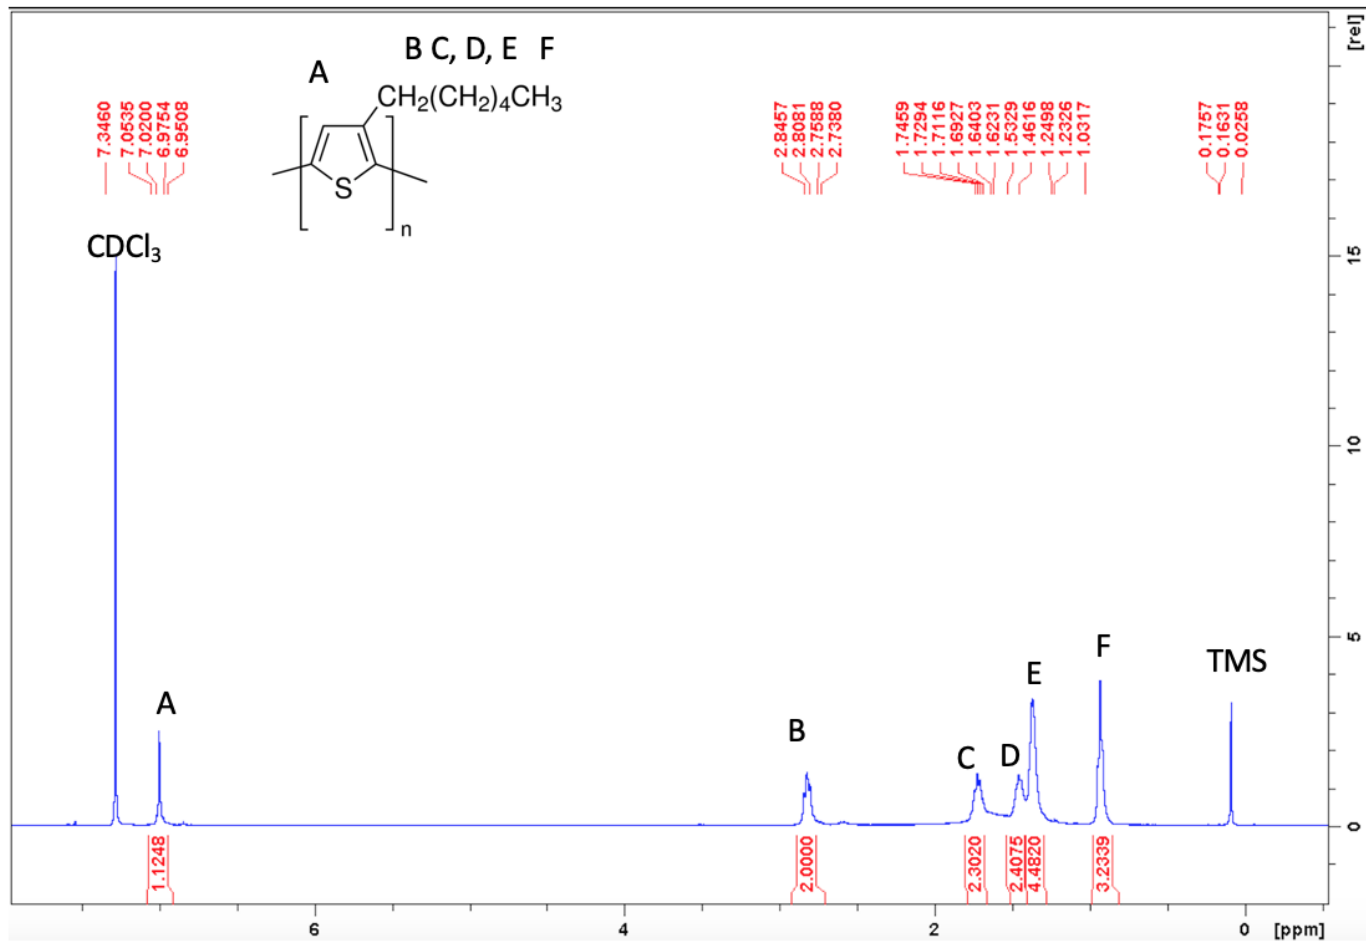

$^1\text{H}$  NMR (300 MHz, Chloroform-*d*)  $\delta$  1.03 (t, 3H), 1.23-1.25(m, 4H), 1.46-1.53 (m, 2H), 1.62-1.75 (m, 2H) 2.74-2.85(t, 2H), 6.98 (s, 1H).

Poly(3,3''-didodecyl quarter thiophene) (PQT12)

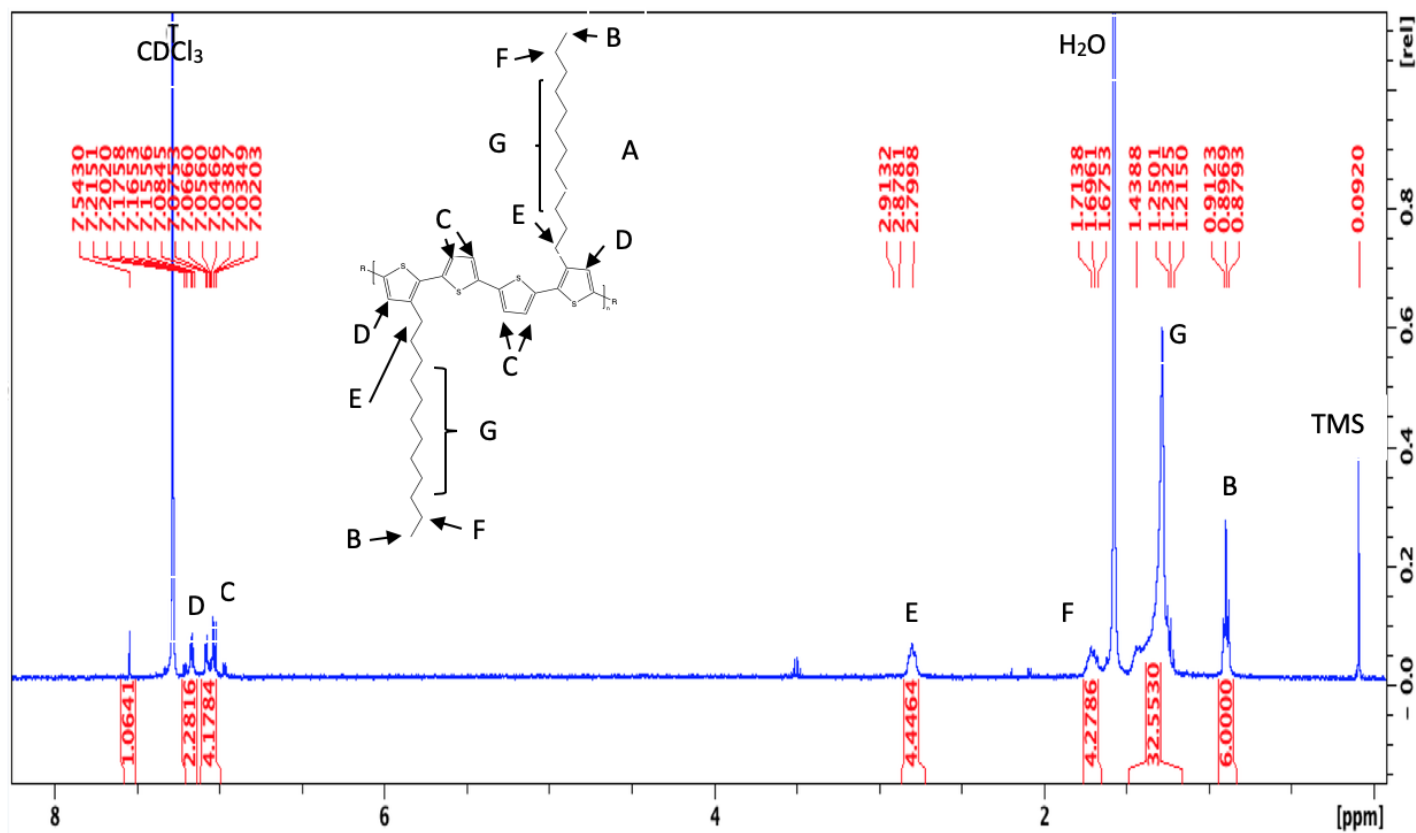

<sup>1</sup>H NMR (300 MHz, Chloroform-*d*) δ 0.88-0.91 (t, 6H), 1.2-1.4(m, 32H), 1.67-1.71 (m, 4H), 2.8-2.91 (m, 4H) 7.02-08(m, 4H), 7.17-7.21 (d, 2H).

Poly[3-(3-Carboxypropyl)thiophene-2,5-diyl]regioregular (PT-COOH)

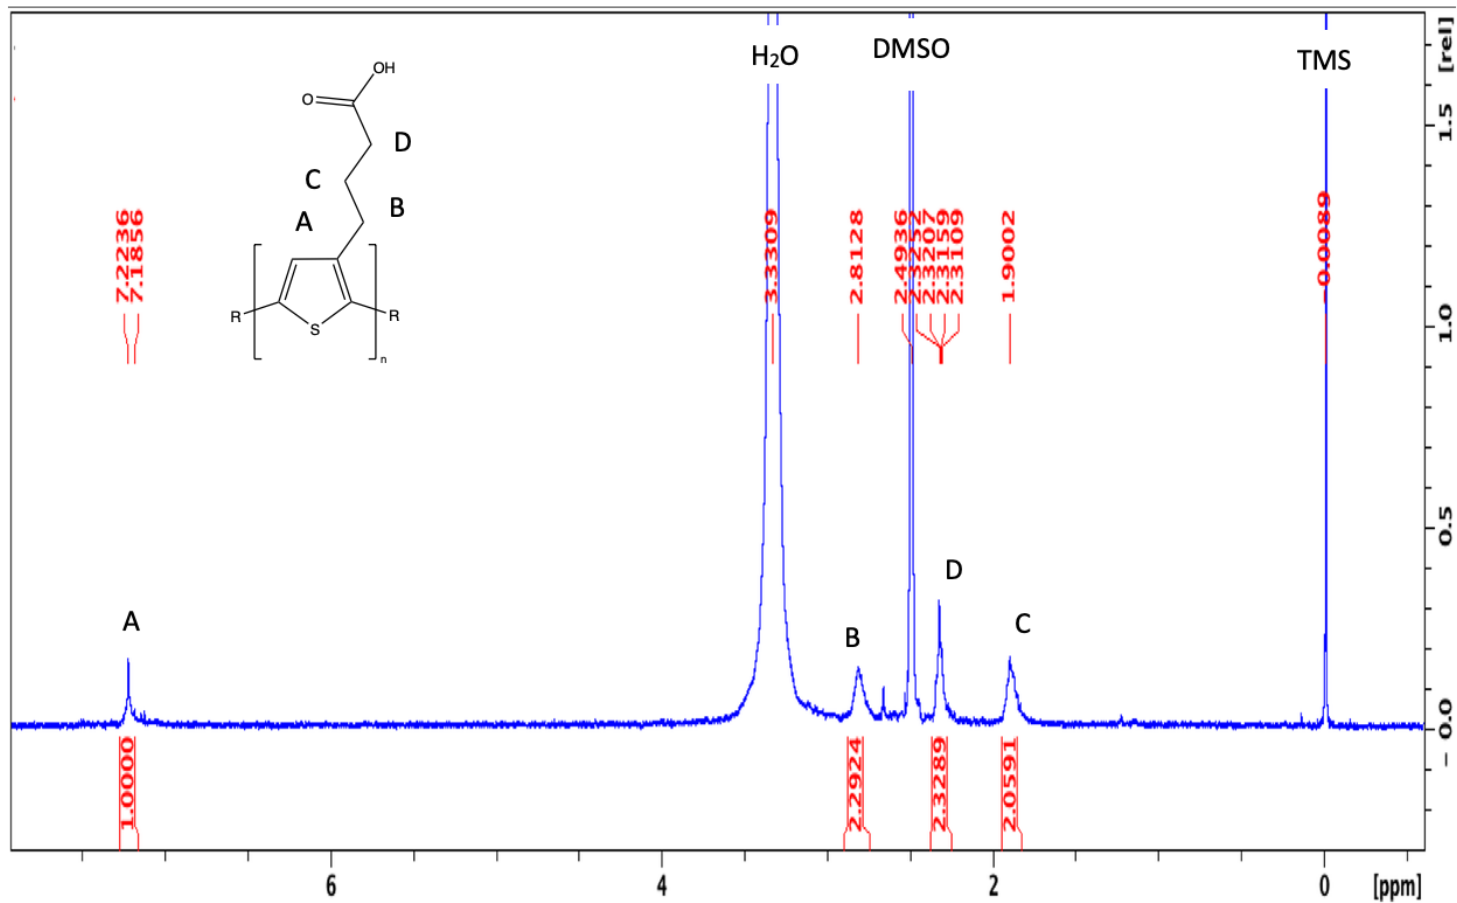

<sup>1</sup>H NMR (300 MHz, DMSO-*d*<sub>6</sub>) δ 1.90 (m, 2H), 2.3-2.5(m, 2H), 2.81 (m, 2H), 7.18-7.22 (d, 1H).

### 3.4 Poly[3-(Ethyl-4-butanoate)thiophene-2,5-diyl]regioregular (PT-COOR)

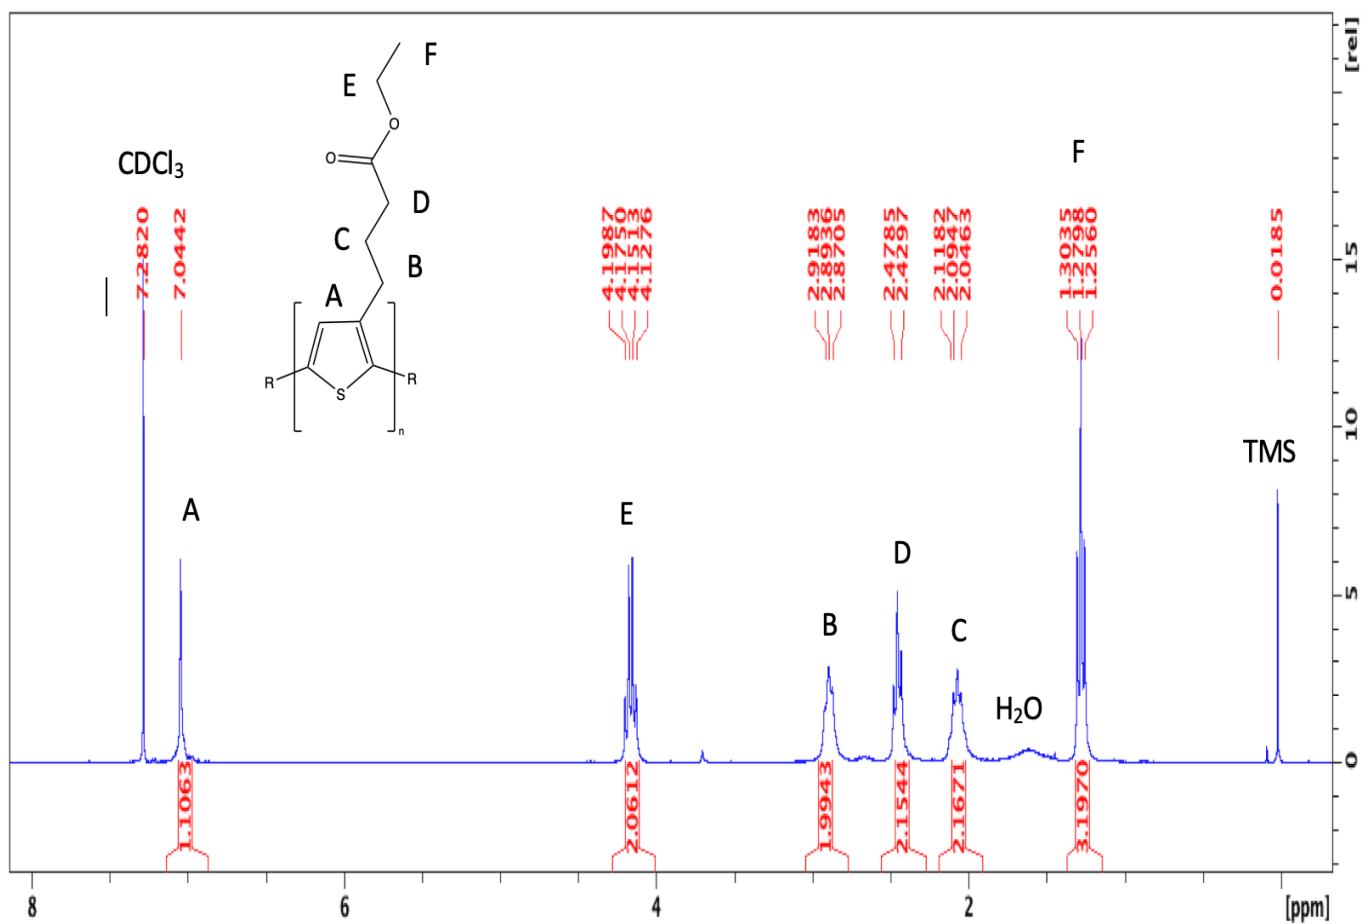

<sup>1</sup>H NMR (300 MHz, Chloroform-*d*) δ 1.26-1.30 (t, 3H), 2.05-2.12(m, 2H), 2.43-2.48 (m, 2H), 2.87-2.92 (m, 2H) 4.13-4.20(t, 2H), 7.04 (s, 1H).

## Gel Permeation Chromatography (GPC):

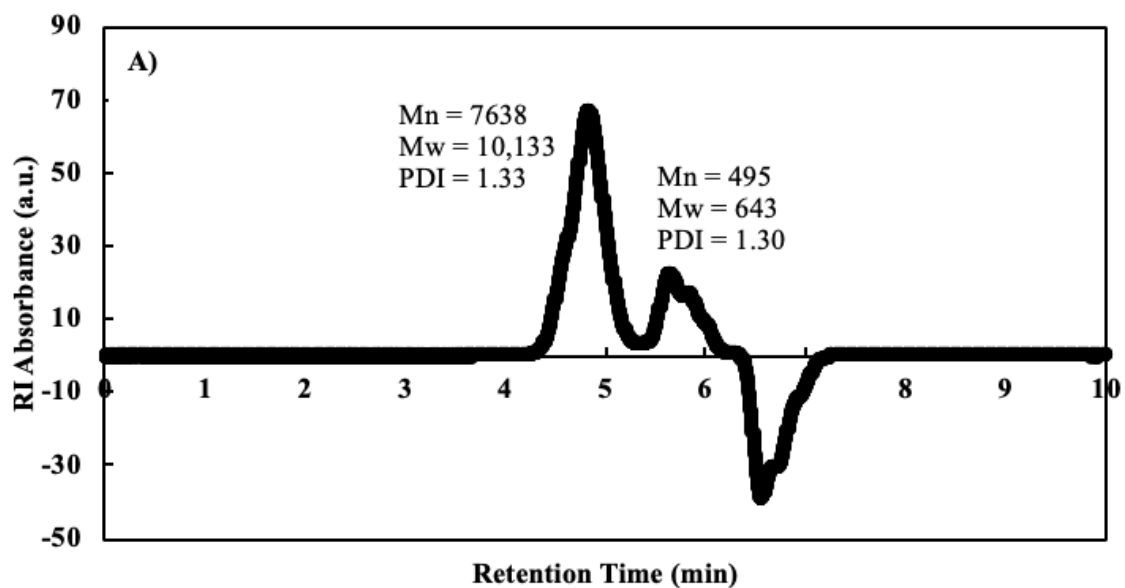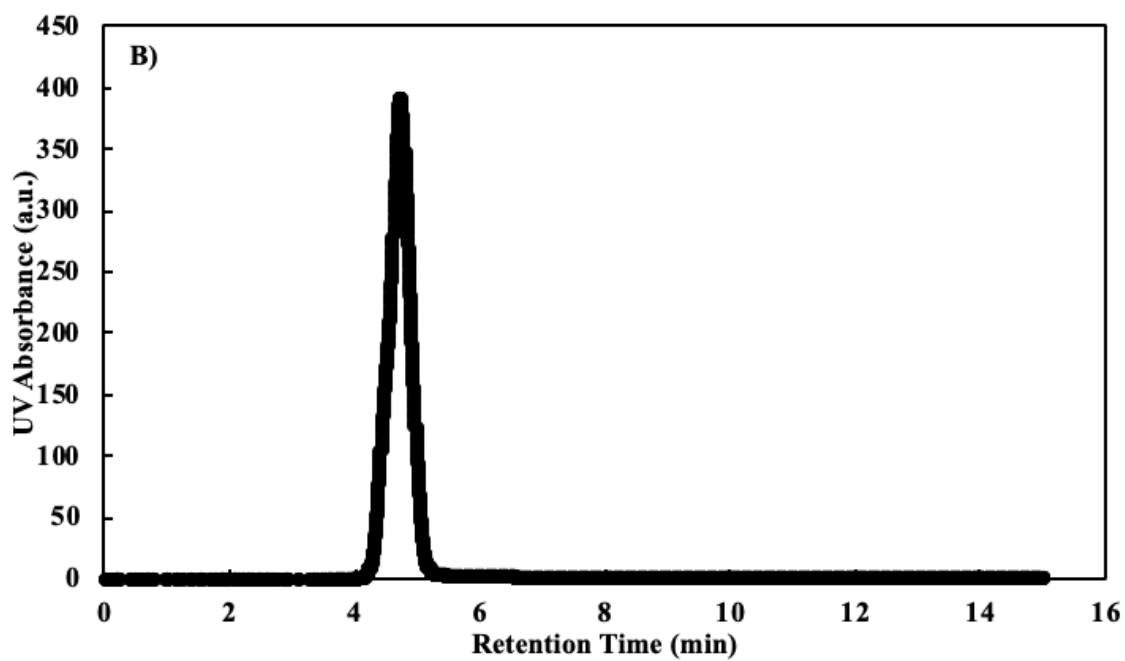

A) RI and B) UV SEC trace of Poly(3-hexylthiophene-2,5-diyl)regioregular after polymerization and purification.
